# Supplementary material
Source: PubMed Central journal article supplement (PMC6763981)
Supplement: jamapsychiatry-77-60-s001.pdf [file jamapsychiatry-77-60-s001.pdf]

## Supplementary Online Content

Morgan DJR, Ho KM, Platell C. Incidence and determinants of mental health service use after bariatric surgery. *JAMA Psychiatry*. Published online September 25, 2019. doi:10.1001/jamapsychiatry.2019.2741

**eFigure.** First Time Patients Presenting to Mental Health Services Following Index Bariatric Surgery: Rates per 1000 patient years follow up

**eTable 1.** International Classification of Diseases 10th Version (ICD-10) Bariatric Surgery Codes

**eTable 2.** International Classification of Diseases 10th Version (ICD-10) Mental and Behavioural Disorder Codes

**eTable 3.** Sub-group analysis: The Incidence Risk Ratios for Different Psychiatric Diagnoses Requiring Either Outpatient, Emergency Department or Hospitalization Services Before and After Index Bariatric Surgery

**eTable 4.** Multivariate Linear Regression with Stepwise Elimination Showing Factors Associated with the Number of Mental Health Presentations for Patients Presenting for the First-Time Following Index Bariatric Surgery Between 2007 and 2016

**eTable 5.** Multivariate Logistic Regression Showing the Risk Factors for 25 Bariatric Patients Who Committed Suicide Out of 261 Deaths After Index Bariatric Procedure

This supplementary material has been provided by the authors to give readers additional information about their work.

**Patients presenting for the first time to psychiatric outpatient clinic services following index bariatric surgery (by year-of-surgery): rates per 1000 patient-years.**

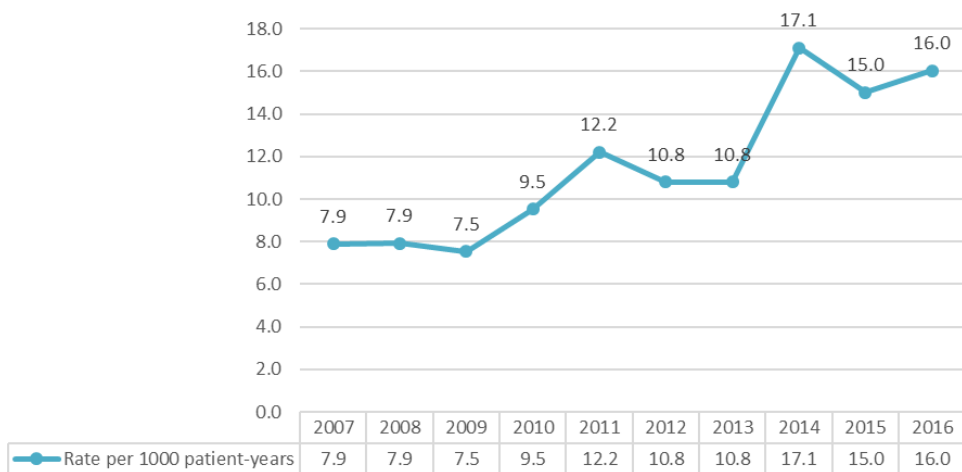

**Patients presenting for the first time to emergency department services following index bariatric surgery (by year-of-surgery): rate per 1000 patient-years**

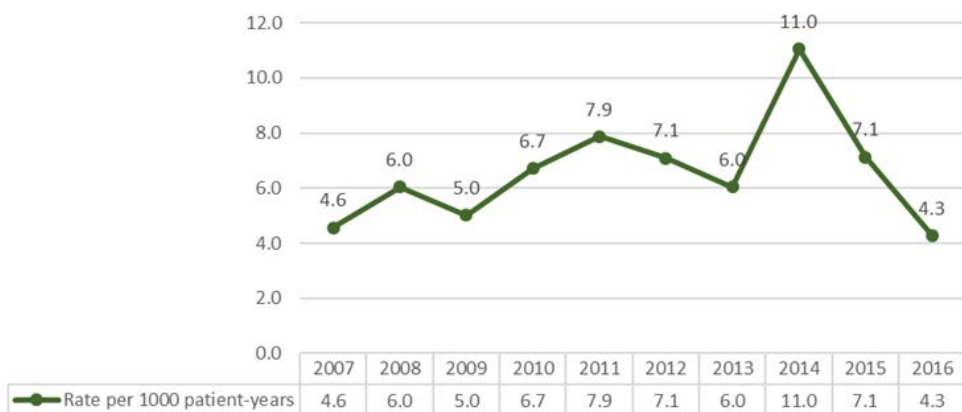

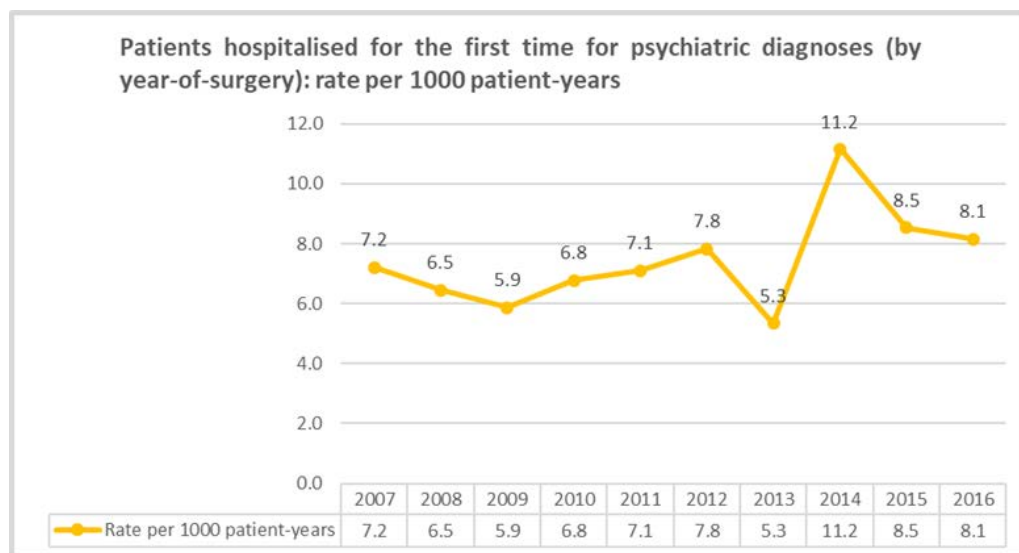

eFigure 1. First Time Patients Presenting to Mental Health Services Following Index Bariatric Surgery: Rates per 1000 patient years follow up

| <b>eTable 1. International Classification of Diseases (ICD-10) Bariatric Surgery Codes.</b> |                                                      |
|---------------------------------------------------------------------------------------------|------------------------------------------------------|
| ICD 10 Code                                                                                 | Bariatric Surgery Description                        |
| The ICD-10 Codes for Bariatric Surgery Prior to July 2013 (Prior to 8th Edition)            |                                                      |
| <b>14215-00</b>                                                                             | Revision of gastric band                             |
| <b>30511-00</b>                                                                             | Gastric reduction                                    |
| <b>30511-01</b>                                                                             | Laparoscopic gastric reduction                       |
| <b>30512-00</b>                                                                             | Gastric bypass                                       |
| <b>30512-01</b>                                                                             | Laparoscopic biliopancreatic diversion               |
| <b>30512-02</b>                                                                             | Biliopancreatic diversion                            |
| <b>30514-00</b>                                                                             | Surgical reversal of procedure for morbid obesity    |
| <b>30518-00 with (E66)</b>                                                                  | Partial gastrectomy (with a co-diagnosis of obesity) |
| <b>90950-00</b>                                                                             | Insertion of gastric bubble or balloon               |
| The ICD-10 Codes for Bariatric Surgery from July 2013 (8th Edition)                         |                                                      |
| <b>30511-09</b>                                                                             | Laparoscopic sleeve gastrectomy                      |
| <b>30511-10</b>                                                                             | Sleeve gastrectomy                                   |
| <b>30511-02</b>                                                                             | Laparoscopic adjustable gastric banding              |
| <b>30511-03</b>                                                                             | Laparoscopic nonadjustable gastric banding           |
| <b>30511-04</b>                                                                             | Adjustable gastric banding                           |
| <b>30511-05</b>                                                                             | Nonadjustable gastric banding                        |
| <b>30512-03</b>                                                                             | Laparoscopic gastric bypass                          |
| <b>30512-00</b>                                                                             | Gastric bypass                                       |
| <b>30512-01</b>                                                                             | Laparoscopic biliopancreatic diversion               |
| <b>30512-02</b>                                                                             | Biliopancreatic diversion                            |
| <b>30511-06</b>                                                                             | Laparoscopic gastroplasty                            |
| <b>30511-07</b>                                                                             | Endoscopic gastroplasty                              |
| <b>30511-08</b>                                                                             | Gastroplasty                                         |
| <b>90940-00</b>                                                                             | Duodenal-jejunal bypass                              |
| <b>90941-00</b>                                                                             | Ileal interposition                                  |
| <b>90950-00</b>                                                                             | Insertion of gastric balloon                         |
| <b>90950-01</b>                                                                             | Removal of gastric balloon                           |
| <b>90942-01</b>                                                                             | Laparoscopic removal of gastric band                 |

|                 |                                           |
|-----------------|-------------------------------------------|
| <b>90942-02</b> | Endoscopic removal of gastric band        |
| <b>90942-00</b> | Removal of gastric band                   |
| <b>14215-01</b> | Adjustment of gastric band reservoir      |
| <b>31441-00</b> | Revision of gastric band reservoir        |
| <b>90943-01</b> | Other laparoscopic procedures for obesity |
| <b>90943-02</b> | Other endoscopic procedures for obesity   |
| <b>90943-00</b> | Other procedures for obesity              |
| <b>30514-01</b> | Revision procedures for obesity           |

| <b>eTable 2. International Classification of Diseases 10<sup>th</sup> Version (ICD-10) Mental and Behavioural Disorder Codes.</b> |                                                                                                                |
|-----------------------------------------------------------------------------------------------------------------------------------|----------------------------------------------------------------------------------------------------------------|
| <b>ICD-10 Code</b>                                                                                                                | <b>Psychiatric Diagnosis</b>                                                                                   |
| <b>F10–F19</b>                                                                                                                    | Mental and behavioural disorders due to psychoactive substance use                                             |
| <b>F20–F29</b>                                                                                                                    | Schizophrenia, schizotypal, and delusional disorders                                                           |
| <b>F30–F39</b>                                                                                                                    | Mood-affective affective disorders                                                                             |
| <b>F40–F48</b>                                                                                                                    | Neurotic, stress-related and somatoform disorders                                                              |
| <b>F50–F59</b>                                                                                                                    | Behavioural syndromes associated with physiological disturbances and physical factors                          |
| <b>F60–F69</b>                                                                                                                    | Disorders of adult personality and behaviour                                                                   |
| <b>F99</b>                                                                                                                        | Unspecified mental disorder                                                                                    |
| <b>X60–X84</b>                                                                                                                    | Intentional or deliberate self-harm (DSH) by either overdoses, exposure to toxic chemicals, or physical trauma |

**eTable 3.** Sub-group analysis: The Incidence Risk Ratios for Different Psychiatric Diagnoses Requiring Either Outpatient, Emergency Department or Hospitalization Services Before and After Index Bariatric Surgery

| <b>eTable 3a. Sub-group analysis: The Incidence Risk Ratios for Different Psychiatric Diagnoses Requiring Either Outpatient, Emergency Department or Hospitalization Services Before and After Index Bariatric Surgery<sup>a</sup> Between 2009 and 2010.<sup>b</sup> (n=5015)</b> |                                  |                                      |                                             |                              |                                      |                                             |                                   |
|------------------------------------------------------------------------------------------------------------------------------------------------------------------------------------------------------------------------------------------------------------------------------------|----------------------------------|--------------------------------------|---------------------------------------------|------------------------------|--------------------------------------|---------------------------------------------|-----------------------------------|
| Psychiatric Diagnosis or Symptomatic Presentation                                                                                                                                                                                                                                  | Prior To Index Bariatric Surgery |                                      |                                             | Post Index Bariatric Surgery |                                      |                                             | Rates Ratio [95% CI] <sup>c</sup> |
|                                                                                                                                                                                                                                                                                    | Patients, n                      | Presentations or Hospitalizations, n | Presentation Rate, per 10 000 patient years | Patients, n                  | Presentations or Hospitalizations, n | Presentation Rate, per 10 000 patient years |                                   |
| Outpatient Clinic Presentations <sup>d</sup>                                                                                                                                                                                                                                       |                                  |                                      |                                             |                              |                                      |                                             |                                   |
| Organic disorders                                                                                                                                                                                                                                                                  | 2                                | 3                                    | 0.8                                         | 2                            | 45                                   | 12.0                                        | 15.9 [4.9 – 51.2]                 |
| Mental disorders due to psychoactive substance use                                                                                                                                                                                                                                 | 12                               | 62                                   | 15.6                                        | 19                           | 438                                  | 117.0                                       | 7.5 [5.7 – 9.8]                   |
| Schizophrenia like disorders                                                                                                                                                                                                                                                       | 13                               | 969                                  | 244.1                                       | 16                           | 1503                                 | 401.4                                       | 1.6 [1.5 – 1.8]                   |
| Mood disorders                                                                                                                                                                                                                                                                     | 105                              | 1934                                 | 487.2                                       | 145                          | 3857                                 | 1030.0                                      | 2.1 [2.0 – 2.2]                   |
| Neurotic disorders                                                                                                                                                                                                                                                                 | 66                               | 796                                  | 200.5                                       | 89                           | 2202                                 | 588.1                                       | 2.9 [2.7 – 3.2]                   |
| Behavioural disorders                                                                                                                                                                                                                                                              | 8                                | 196                                  | 49.4                                        | 13                           | 290                                  | 77.5                                        | 1.6 [1.3 – 1.9]                   |
| Personality disorders                                                                                                                                                                                                                                                              | 17                               | 849                                  | 213.9                                       | 34                           | 1936                                 | 517.1                                       | 2.4 [2.2 – 2.6]                   |
| Psychological development disorders                                                                                                                                                                                                                                                | 0                                | 0                                    | 0.0                                         | 0                            | 0                                    | 0.0                                         | Not able to be estimated          |
| Unspecified disorders                                                                                                                                                                                                                                                              | 6                                | 426                                  | 107.3                                       | 5                            | 63                                   | 16.8                                        | 0.2 [0.1 – 0.2]                   |
| Psychiatric evaluation / examination                                                                                                                                                                                                                                               | 3                                | 8                                    | 15.9                                        | 7                            | 148                                  | 39.5                                        | 2.5 [1.9 – 3.3]                   |
| No recorded diagnosis                                                                                                                                                                                                                                                              | 110                              | 240                                  | 60.4                                        | 192                          | 596                                  | 159.2                                       | 2.6 [2.3 – 3.0]                   |
| <b>Total</b>                                                                                                                                                                                                                                                                       | <b>288<sup>e</sup></b>           | <b>5483</b>                          | <b>1381.0</b>                               | <b>431<sup>e</sup></b>       | <b>11 078</b>                        | <b>2959.0</b>                               | <b>2.1 [2.1 – 2.2]</b>            |
| Emergency Department Presentations <sup>f</sup>                                                                                                                                                                                                                                    |                                  |                                      |                                             |                              |                                      |                                             |                                   |
| Drug & alcohol overdoses                                                                                                                                                                                                                                                           | 33                               | 39                                   | 9.8                                         | 95                           | 132                                  | 35.3                                        | 3.6 [2.5 – 5.1]                   |
| Psychotic disorders                                                                                                                                                                                                                                                                | 4                                | 4                                    | 1.0                                         | 7                            | 16                                   | 4.3                                         | 4.2 [1.4 – 12.7]                  |
| Mood disorders                                                                                                                                                                                                                                                                     | 12                               | 15                                   | 3.8                                         | 44                           | 48                                   | 12.8                                        | 3.4 [1.9 – 6.1]                   |

|                                                    |                  |     |       |                  |      |       |                    |
|----------------------------------------------------|------------------|-----|-------|------------------|------|-------|--------------------|
| Neurotic disorders                                 | 6                | 6   | 1.5   | 32               | 45   | 12.0  | 8.0 [3.4 – 18.6]   |
| Behavioural disorders                              | 8                | 8   | 2.0   | 35               | 50   | 13.4  | 2.7 [2.2 – 3.4]    |
| Personality disorders                              | 3                | 3   | 0.8   | 20               | 21   | 5.6   | 7.4 [2.2 – 24.9]   |
| Deliberate self-harm                               | 3                | 3   | 0.8   | 20               | 27   | 7.2   | 9.5 [2.9 – 31.5]   |
| Suicidal ideation                                  | 6                | 7   | 1.8   | 58               | 102  | 27.2  | 15.5 [7.2 – 33.2]  |
| Non-specific psychiatric                           | 3                | 3   | 0.8   | 21               | 26   | 6.9   | 9.2 [2.8 – 30.4]   |
| Requesting psychiatric review                      | 5                | 7   | 1.8   | 16               | 22   | 5.9   | 3.3 [1.4 – 7.8]    |
| Total                                              | 65 <sup>e</sup>  | 95  | 23.9  | 229 <sup>e</sup> | 489  | 130.6 | 5.5 [4.4 – 6.8]    |
| Hospitalizations <sup>d</sup>                      |                  |     |       |                  |      |       |                    |
| Mental disorders due to psychoactive substance use | 35               | 77  | 19.4  | 102              | 257  | 68.6  | 3.5 [2.7 – 4.6]    |
| Schizophrenia disorders                            | 10               | 14  | 3.5   | 19               | 88   | 23.5  | 6.7 [3.8 – 11.7]   |
| Mood disorders                                     | 116              | 304 | 76.6  | 182              | 423  | 113.0 | 1.5 [1.3 – 1.7]    |
| Neurotic disorders                                 | 93               | 209 | 52.6  | 170              | 324  | 86.5  | 1.6 [1.4 – 1.9]    |
| Behavioural disorders                              | 1                | 1   | 0.3   | 12               | 15   | 4.0   | 15.9 [2.1 – 120.4] |
| Personality disorders                              | 17               | 52  | 13.1  | 40               | 102  | 27.2  | 2.1 [1.5 – 2.9]    |
| Total                                              | 171 <sup>e</sup> | 657 | 165.5 | 303 <sup>e</sup> | 1209 | 322.9 | 1.5 [1.3 – 1.7]    |

<sup>a</sup> Index bariatric surgery refers to the original bariatric surgery occurring between the two year period 2009 - 2010. <sup>b</sup> Follow up periods: 39 699.6 years prior to index bariatric cases and 37 440.2 years post index bariatric surgery. <sup>c</sup> Comparison made between prior-and-post bariatric surgery psychiatric presentation or hospitalization rates. <sup>d</sup> Based on ICD-10 codes. <sup>e</sup> Patients with multiple psychiatric presentations are only counted once. <sup>f</sup> Based on the Department of Health Emergency Department Information System (EDIS).



**eTable 3b. Sub-group analysis: The Incidence Risk Ratios for Different Psychiatric Diagnoses Requiring Either Outpatient, Emergency Department or Hospitalization Services Before and After Index Bariatric Surgery <sup>a</sup> Between 2009 and 2010. Subdivided by the Need for Repeat Bariatric Surgery. (n=5015)**

| Mode of Psychiatric Presentation                    | Prior To Index Bariatric Surgery |                                      |                                             | Post Index Bariatric Surgery |                                      |                                             | Rates Ratio [95% CI] <sup>b</sup> |
|-----------------------------------------------------|----------------------------------|--------------------------------------|---------------------------------------------|------------------------------|--------------------------------------|---------------------------------------------|-----------------------------------|
|                                                     | Patients, n                      | Presentations or Hospitalizations, n | Presentation Rate, per 10 000 patient years | Patients, n                  | Presentations or Hospitalizations, n | Presentation Rate, per 10 000 patient years |                                   |
| Single Bariatric Admission (n= 3276) <sup>c</sup>   |                                  |                                      |                                             |                              |                                      |                                             |                                   |
| Outpatient Clinic                                   | 169                              | 2918                                 | 1122.0                                      | 240                          | 7016                                 | 2881.0                                      | 2.6 [2.5 – 2.7]                   |
| Emergency Department                                | 34                               | 55                                   | 21.2                                        | 132                          | 308                                  | 126.5                                       | 6.0 [4.5 – 8.0]                   |
| Hospitalization                                     | 98                               | 349                                  | 134.2                                       | 168                          | 702                                  | 288.2                                       | 2.1 [1.9 – 2.2]                   |
| Multiple Bariatric Admissions (n=1739) <sup>d</sup> |                                  |                                      |                                             |                              |                                      |                                             |                                   |
| Outpatient Clinic                                   | 119                              | 2565                                 | 1873.0                                      | 191                          | 4062                                 | 3104.0                                      | 1.7 [1.6 – 1.7]                   |
| Emergency Department                                | 31                               | 40                                   | 29.2                                        | 97                           | 181                                  | 138.3                                       | 4.7 [3.4 – 6.7]                   |
| Hospitalization                                     | 73                               | 308                                  | 224.9                                       | 135                          | 507                                  | 387.5                                       | 1.7 [1.5 – 2.0]                   |

<sup>a</sup> Index bariatric surgery refers to the original bariatric surgery occurring between the two year period 2009 - 2010. <sup>b</sup> Comparison made between prior-and-post bariatric surgery psychiatric presentation or hospitalization rates. <sup>c</sup> Follow up period for patients with single bariatric procedures: 26 005.8 years prior to index bariatric cases and 24 355.3 years post index bariatric surgery. <sup>d</sup> Follow up period for patients with multiple bariatric procedures: 13 693.8 years prior to index bariatric cases and 13 084.8 years post index bariatric surgery.

**eTable 3c. Sub-group analysis: The Incidence Risk Ratios for Different Psychiatric Diagnoses Requiring Either Outpatient, Emergency Department or Hospitalization Services Before and After Index Bariatric Surgery <sup>a</sup> Between 2007 and 2016. Limited to Patients with ≤ 24 Months Post-operative Follow-up. (n=4392)**

| Mode of Psychiatric Presentation | Prior To Index Bariatric Surgery <sup>b</sup> |                                      |                                             | Post Index Bariatric Surgery <sup>b</sup> |                                      |                                             | Rates Ratio [95% CI] <sup>c</sup> |
|----------------------------------|-----------------------------------------------|--------------------------------------|---------------------------------------------|-------------------------------------------|--------------------------------------|---------------------------------------------|-----------------------------------|
|                                  | Patients, n                                   | Presentations or Hospitalizations, n | Presentation Rate, per 10 000 patient years | Patients, n                               | Presentations or Hospitalizations, n | Presentation Rate, per 10 000 patient years |                                   |
| Outpatient Clinic                | 310                                           | 9664                                 | 1605.0                                      | 172                                       | 3017                                 | 5568.0                                      | 3.5 [3.3 – 3.6]                   |
| Emergency Department             | 167                                           | 410                                  | 66.1                                        | 42                                        | 68                                   | 125.5                                       | 1.9 [1.5 – 2.4]                   |
| Hospitalization                  | 175                                           | 659                                  | 106.2                                       | 74                                        | 175                                  | 323.0                                       | 3.0 [2.6 – 3.5]                   |

<sup>a</sup> Index bariatric surgery refers to the original bariatric surgery occurring between the two year period 2007 - 2016. <sup>b</sup> Follow up period: 62 076.2 years prior to index bariatric cases and 5418.6 years post index bariatric surgery. <sup>c</sup> Comparison made between prior-and-post bariatric surgery psychiatric presentation or hospitalization rates.

**eTable 4. Multivariate Linear Regression with Stepwise Elimination Showing Factors Associated with the Number of Mental Health Presentations for Patients Presenting for the First-Time Following Index Bariatric Surgery Between 2007 and 2016. <sup>a</sup>**

| Characteristic                                                             | First-time Psychiatric OPC Presentation After Bariatric Surgery (n=1207) [95%CI] | First-time Psychiatric ED Presentation After Bariatric Surgery (n=807) [95%CI] | First-time Psychiatric Hospitalization After Bariatric Surgery (n=873) [95%CI] |
|----------------------------------------------------------------------------|----------------------------------------------------------------------------------|--------------------------------------------------------------------------------|--------------------------------------------------------------------------------|
| Constant                                                                   | 175.95                                                                           | 17.98                                                                          | 50.88                                                                          |
| <b>Demographics</b>                                                        |                                                                                  |                                                                                |                                                                                |
| Age – per year                                                             | -0.002 [-0.003 to -0.002]                                                        | -0.002 [0.003 to -0.002]                                                       | -0.001 [-0.003 to 0.000]                                                       |
| Sex – male                                                                 | Excluded                                                                         | 0.02 [0.00 – 0.04]                                                             | 1.22 [1.03 – 1.44]                                                             |
| Private health insurance                                                   | 0.43 [0.20 to 0.66]                                                              | 0.04 [0.02 to 0.06]                                                            | Excluded                                                                       |
| Charlson comorbidity score ≥ 1                                             | Excluded                                                                         | Excluded                                                                       | Excluded                                                                       |
| Index surgery undertaken at a rural hospital                               | Excluded                                                                         | Excluded                                                                       | Excluded                                                                       |
| SEIFA LGA IRSD 2011 disadvantage score, per increasing decile <sup>b</sup> | Excluded                                                                         | Excluded                                                                       | Excluded                                                                       |
| <b>Preoperative psychiatric history</b>                                    |                                                                                  |                                                                                |                                                                                |
| Pre-index surgery psychiatric OPC presentation                             | n/a                                                                              | 0.18 [0.15 to 0.21]                                                            | 0.28 [0.22 to 0.34]                                                            |
| Pre-index surgery psychiatric ED presentation                              | 0.92 [0.36 to 1.47]                                                              | n/a                                                                            | 0.50 [0.39 – 0.61]                                                             |
| Pre-index surgery psychiatric hospitalization                              | 0.83 [0.40 to 1.26]                                                              | 0.35 [0.31 to 0.40]                                                            | n/a                                                                            |
| <b>Surgical factors</b>                                                    |                                                                                  |                                                                                |                                                                                |
| Index surgery – gastric band <sup>c</sup>                                  | Excluded                                                                         | Excluded                                                                       | Excluded                                                                       |
| Index surgery – sleeve gastrectomy <sup>c</sup>                            | Excluded                                                                         | Excluded                                                                       | Excluded                                                                       |
| Index surgery – bypass procedure <sup>c</sup>                              | Excluded                                                                         | Excluded                                                                       | Excluded                                                                       |
| Repeat bariatric surgery – obesity only <sup>d</sup>                       | Excluded                                                                         | Excluded                                                                       | Excluded                                                                       |
| Repeat bariatric surgery – complication only <sup>d</sup>                  | Excluded                                                                         | Excluded                                                                       | Excluded                                                                       |
| Repeat bariatric surgery – complication and obesity <sup>d</sup>           | 0.29 [0.01 to 0.57]                                                              | 0.05 [0.03 – 0.08]                                                             | Excluded                                                                       |

Abbreviations: CI, confidence intervals; OPC, outpatient clinic; ED, emergency department; SEIFA, Socio-Economic Indexes for Areas; IRSD, The Index of Relative Socio-Economic Disadvantage; LGA, local government area.

<sup>a</sup> Total cohort size = 24 766 bariatric patients with the multivariate linear regression adjusted for year-of-surgery and duration of follow-up. <sup>b</sup> The IRSD is a general socio-economic index that summarizes a range of information about the economic and social conditions of people and households within an area. This index includes only measures of relative disadvantage with lower scores equating with increasing disadvantage. The average IRSD equals 1000 and roughly two-thirds of the scores lie between 900 and 1100. <sup>c</sup> When compared to the remaining bariatric surgery group of restrictive procedures. <sup>d</sup> When compared to patients not requiring repeated bariatric procedures.

**eTable 5. Multivariate Logistic Regression Showing the Risk Factors for 25 Bariatric Patients Who Committed Suicide Out of 261 Deaths After Index Bariatric Procedure. <sup>a</sup>**

| Characteristic                                                                                          | Multivariate OR<br>[95%CI] <sup>b</sup> | P value |
|---------------------------------------------------------------------------------------------------------|-----------------------------------------|---------|
| Age (per year)                                                                                          | n/a <sup>c</sup>                        | n/a     |
| Sex– male                                                                                               | 2.35 [0.93 – 5.95]                      | 0.07    |
| Private insurance                                                                                       | n/a <sup>c</sup>                        | n/a     |
| Charlson comorbidity index > 0                                                                          | n/a <sup>c</sup>                        | n/a     |
| Index bariatric surgery undertaken at a rural hospital                                                  | n/a <sup>c</sup>                        | n/a     |
| SEIFA LGA IRSD, per increasing decile <sup>d</sup>                                                      | n/a <sup>c</sup>                        | n/a     |
| Prior ED presentation with DSH or suicidal ideation                                                     | n/a <sup>c</sup>                        | n/a     |
| Prior hospitalization – deliberate self-harm <sup>e</sup>                                               | 5.34 [1.22 – 23.34]                     | 0.03    |
| Prior hospitalization – mental and behavioural disorders due to psychoactive substance use <sup>e</sup> | 4.69 [1.03 – 21.30]                     | 0.04    |
| Prior hospitalization – mood disorders <sup>e</sup>                                                     | 3.47 [0.81 – 14.94]                     | 0.09    |
| Type of operation – gastric band <sup>f</sup>                                                           | 0.25 [0.04 – 1.70]                      | 0.16    |
| Type of operation – gastric sleeve <sup>f</sup>                                                         | 0.00                                    | 0.99    |
| Type of operation – gastric bypass <sup>f</sup>                                                         | 0.00                                    | 0.99    |
| Repeat surgery – obesity <sup>g</sup>                                                                   | 2.96 [0.35 – 24.95]                     | 0.32    |
| Repeat surgery – complications <sup>g</sup>                                                             | 3.43 [1.14 – 10.25]                     | 0.28    |
| Repeat surgery – obesity and complications <sup>g</sup>                                                 | 3.21 [0.64 – 16.12]                     | 0.16    |

Abbreviations: OR, odds ratio; CI, confidence interval; SEIFA, Socio-Economic Indexes for Areas; LGA, local government area; IRSD, The Index of Relative Socio-Economic Disadvantage; ED, emergency department; DSH, deliberate self-harm.

<sup>a</sup> Index procedure is when the original bariatric surgery occurred between 2007 and 2016. Total cohort size = 24 766 bariatric patients. <sup>b</sup> Multivariate logistic regression adjusted for year-of-surgery and duration of follow-up. <sup>c</sup> Excluded in stepwise backward elimination. <sup>d</sup> The IRSD is a general socio-economic index that summarizes a range of information about the economic and social conditions of people and households within an area. It only includes only measures of relative disadvantage with lower deciles equating with increasing disadvantage. <sup>e</sup> Using ICD-10 classifications. <sup>f</sup> Type of surgery as a single categorical variable compared to the remaining bariatric surgery group of restrictive procedures. <sup>g</sup> Repeat surgery as a single categorical variable compared to patients not requiring repeated bariatric procedures.
